# Supplementary material
Source: MDPI journal article supplement (https://www.mdpi.com/2673-3897/4/1/6)
Supplement: s1 [file s1]

**Figure S1 Principal Component analysis (PCA) of primary endometrial epithelial cell transcriptomes** from nine patients, four proliferative (non-receptive) samples (orange) and five mid-secretory phase (receptive) samples (blue). PCA calculated on DEGs (n=440,  $p < 0.01$ ) between proliferative and mid-secretory samples. Data from Chi et al 2020.

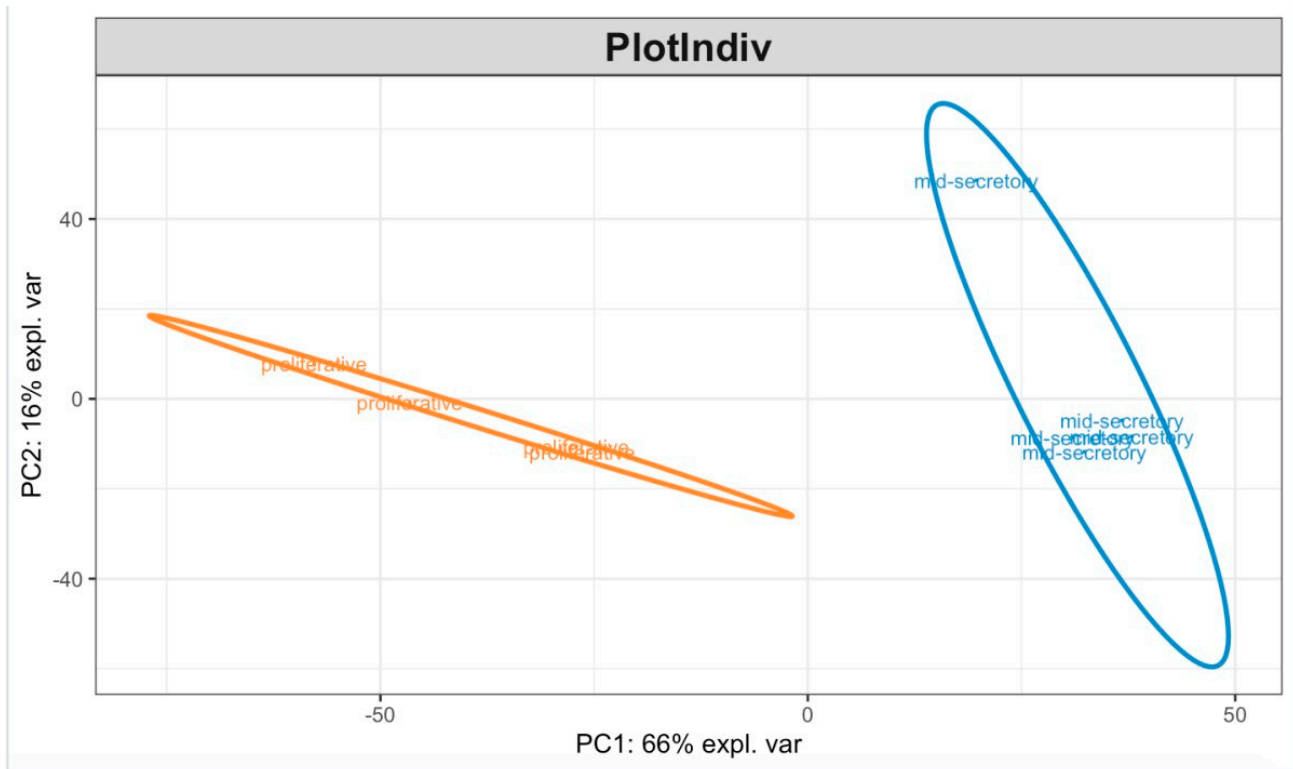

Table S1 Genes identified in the hypernetwork clusters from bulk transcriptome EEC.

| EEC cluster 1 | EEC cluster 2 | EEC cluster 3 |
|---------------|---------------|---------------|
| ADCYAP1R1     | ANXA2         | APOE          |
| COL27A1       | ANXA4         | CLCF1         |
| COMP          | APOL1         | CRYAB         |
| CPM           | C3            | CTSB          |
| CTSH          | C4BPA         | CTSW          |
| DPP4          | CD44          | CXCL2         |
| EMID1         | CP            | CXCR4         |
| FGFR3         | CXCL14        | EFEMP1        |
| IHH           | DEFB1         | GNLY          |
| IL15RA        | DKK1          | GPX3          |
| IL2RB         | GAST          | GRN           |
| PAPLN         | IL1R1         | HABP2         |
| PCSK5         | IL6ST         | IGFBP1        |
| PDGFC         | ITGA3         | IGFBP3        |
| PRLR          | MST1R         | LAMB3         |
| S100A4        | MUC16         | LGALS3        |
| SCARA5        | PPFIBP2       | LYPD3         |
| SERPINA5      | SCGB2A1       | MMP10         |
| SERPINE1      | SFN           | RBP4          |
| TFPI          | STC1          | S100A13       |
| TGM2          | TRPM8         | SERPING1      |
| TIMP3         | AIMP1         | SLPI          |
| VIM           |               | THBD          |
| WFDC2         |               | TMPRSS13      |
| ADAMTS5       |               | ADM           |
|               |               | APOD          |

Table S2: Genes iden-tified in the hypernetwork clusters from single-cell LE, CE and GE transcriptomes.

| LE cluster | CE cluster | GE cluster |
|------------|------------|------------|
| ATP1A1     | ACTG1      | MTRNR2L1   |
| CD55       | ADM        | EPB41L2    |
| CNDP2      | AKR7A2     | IGFBP4     |
| ACSL4      | ANXA1      |            |
| ANXA4      | ANXA2      |            |
| CKB        | ATP5O      |            |
| CRYAB      | ATPIF1     |            |
| CRISP3     | BLOC1S1    |            |
| ENPP3      | BTG2       |            |
| FAM213A    | CALM3      |            |
| GRN        | CCDC80     |            |
| HSP90B1    | CD24       |            |
| IL6        | CD55       |            |
| MDK        | CD81       |            |
| PPIB       | CKB        |            |
| PSAT1      | CLDN3      |            |
| PTGS1      | CRISP3     |            |
| RNASET2    | CRYAB      |            |
| RPS26      | CTGF       |            |
| SERPINA5   | CXCL2      |            |
| SLC26A2    | CXCL8      |            |
| VIM        | DDX5       |            |
| WLS        | DNAJA1     |            |
|            | DNAJB1     |            |
|            | DNPH1      |            |
|            | DSP        |            |
|            | DSTN       |            |
|            | EDN1       |            |
|            | EPHA2      |            |
|            | EPPIN      |            |
|            | EZR        |            |
|            | FUZ        |            |
|            | GAPDH      |            |
|            | HNRNPA1    |            |
|            | HSP90AA1   |            |
|            | HSP90AB1   |            |
|            | HSPA1B     |            |
|            | HSPA5      |            |
|            | HSPA8      |            |
|            | HSPH1      |            |
|            | IDH2       |            |
|            | IGFBP4     |            |
|            | IK         |            |
|            | IL18       |            |
|            | ITGB1      |            |
|            | ITGB8      |            |
|            | KRT18      |            |
|            | KRT19      |            |
|            | LGALS1     |            |
|            | LGALS3     |            |
|            | MAPK15     |            |
|            | MDK        |            |
|            | METRNL     |            |
|            | NAMPT      |            |
|            | NCL        |            |
|            | PAEP       |            |
|            | PARK7      |            |
|            | PFN2       |            |
|            | PPP1R7     |            |
|            | PSMB5      |            |
|            | QPR1       |            |
|            | RHOB       |            |
|            | RND3       |            |
|            | RPL31      |            |
|            | RPL4       |            |
|            | RPS10      |            |
|            | S100A11    |            |
|            | S100A6     |            |
|            | SCPEP1     |            |
|            | SERPINA6   |            |
|            | SFPQ       |            |
|            | SFRP4      |            |
|            | SLC26A2    |            |
|            | SLPI       |            |
|            | SOD2       |            |
|            | SPAG9      |            |
|            | SQSTM1     |            |
|            | TNFAIP3    |            |
|            | TPM3       |            |
|            | TPT1       |            |
|            | TSPAN6     |            |
|            | UBC        |            |
|            | VIM        |            |
|            | WFDC2      |            |
|            | YWHAZ      |            |
